# Supplementary material
Source: PubMed Central journal article supplement (PMC4349985)
Supplement: supp_M114.042812_mcp.M114.042812-2.pdf [file supp_M114.042812_mcp.M114.042812-2.pdf]

## Supplemental Experimental Procedures:

**Derivation of the sampling density.** Based on Hoof et al. (1), we define the presentation density ( $D$ ) of each protein sequence as  $D = K/(L - 8)$ , where  $K$  is a weighted count of HLA-I presented peptides mapped to the protein in question,  $L$  is the length of the protein and  $L-8$  is therefore the number of potential 9-mer peptides. If  $X = \{x_1, x_2, \dots, x_H\}$  is the set of  $H$  presented HLA-I binding peptides ( $x_i$ ) in protein sequence  $S$  and  $N(x)$  is the number of expressed protein sequences sharing peptide  $x$  then we define  $K(S)$  as:

$$K(S) = \sum_{x \in X} P(x|N(x))$$

The term  $P(x|N(x))$  is the probability of cleaving peptide  $x$  from protein sequence  $S$ . We then constructed a simple ad-hoc weighting-scheme that adds a contribution to the baseline cleavage probability ( $q$ ) as a function of  $N$ :

$$P(x|N) = q + (1 - q)^N$$

The a priori expectation is that about 1/5 peptides that can be generated from a protein sequence will be generated via the proteasome (2). Thus,  $q=0.20$ . The posterior probability of cleaving  $x$  from a single sequence  $S$  from  $N$  possible sequences is  $P(x|N)$  and the posterior number of expected cleavage events knowing  $x$  is observed is therefore  $P(x|N)*N$ . The purpose of the ad-hoc estimate of the posterior cleavage probability is to ensure that  $P(x|N)*N \geq 1$  for any  $N$  to account for  $x$  being observed. If  $N=1$  then  $P(x|1)=1$  i.e. the weighting-scheme automatically counts uniquely assigned peptides with both a weight and a count of 1 since  $P(x|1) = q + (1-q)^1 = 1$ . The table

below shows the effect of  $P(x|N)$  as  $N$  grows. The asymptotic value of  $P(x|N)$  is of course  $q$  as  $N$  approaches infinity because then the a priori expectation is to observe  $x$  at least one time already.

| N  | $(1-q)^N$ | $P(x N)$ |
|----|-----------|----------|
| 1  | 0.80000   | 1.00000  |
| 2  | 0.64000   | 0.84000  |
| 3  | 0.51200   | 0.71200  |
| 4  | 0.40960   | 0.60960  |
| 5  | 0.32768   | 0.52768  |
| 6  | 0.262144  | 0.462144 |
| 7  | 0.209715  | 0.409715 |
| 8  | 0.167772  | 0.367772 |
| 9  | 0.134218  | 0.334218 |
| 10 | 0.107374  | 0.307374 |
| 20 | 0.011529  | 0.211529 |
| 30 | 0.001238  | 0.201238 |
| 40 | 0.000133  | 0.200133 |
| 50 | 0.000014  | 0.200014 |

**The effect of  $P(x|N)$  as  $N$  grows.**

1. Hoof, I., van Baarle, D., Hildebrand, W. H., and Kesmir, C. (2012) Proteome sampling by the HLA class I antigen processing pathway. *PLoS computational biology* 8, e1002517.
2. Yewdell, J. W., and Bennink, J. R. (1999) Immunodominance in major histocompatibility complex class I-restricted T lymphocyte responses. *Annual review of immunology* 17, 51-88.
