# Supplementary material
Source: PubMed Central journal article supplement (PMC4349985)
Supplement: supp_M114.042812_mcp.M114.042812-12.pdf [file supp_M114.042812_mcp.M114.042812-12.pdf]

Table S9: HLA-I peptides identified from cancer associated proteins.

|                                | Protein name | Uniprot          | HLA-I peptide sequence | Immuno-genicity score | Cell line                               | HLA allele              | Affinity (nM) |
|--------------------------------|--------------|------------------|------------------------|-----------------------|-----------------------------------------|-------------------------|---------------|
| Shared tumor-specific antigens | MAGEA12      | P43365           | <b>KMAELVHFL</b>       | <b>0.23721</b>        | <b>JY</b>                               | <b>A*02:01</b>          | <b>3</b>      |
|                                | MAGEA1       | P43355           | <b>SAFPTTINF</b>       | <b>0.20972</b>        | <b>SupB15WT, SupB15RT</b>               | <b>Cw*12:04</b>         | <b>110</b>    |
|                                |              |                  | <b>EVYDGREHSA</b>      | 0.12941               | SupB15WT, SupB15RT                      | n.d                     | n.d           |
|                                | MAGEA3       | P43357           | <b>EVDPIGHLY</b>       | <b>0.17836</b>        | <b>HCT116</b>                           | <b>A*01:01;Cw*05:01</b> | <b>16;42</b>  |
|                                | CCDC110      | Q8TBZ0           | QTDPDVHRNGK<br>Y       | 0.03625               | HCT116                                  | A*01:01;Cw*05:01        | 11;36         |
| CXorf61 (KKLC1)                | Q5H943       | LVRPSSSGL        | -0.43101               | HCC1937               | B*07:02                                 | 39                      |               |
| Over-expressed in cancer       | CCND1        | P24385           | <b>TPHDFIEHF</b>       | <b>0.3755</b>         | <b>HCC1143</b>                          | <b>B*3508</b>           | <b>368</b>    |
|                                |              |                  | <b>KETIPLTAEKL</b>     | <b>0.15805</b>        | <b>HCC1937</b>                          | <b>B*40:01</b>          | <b>23</b>     |
|                                |              |                  | NLRSPNNFLSY            | -0.16889              | Fibroblast                              | B*15:18                 | 1570          |
|                                | EPCAM        | P16422           | <b>DVDIADVAY</b>       | <b>0.2578</b>         | <b>HCC1143</b>                          | <b>B*35:08</b>          | <b>127</b>    |
|                                |              |                  | <b>AATATFAAA</b>       | <b>0.25585</b>        | <b>HCC1937</b>                          | <b>Cw*03:04</b>         | <b>1034</b>   |
|                                |              |                  | KPYDSKSLRTAL           | -0.41754              | HCC1937                                 | B*07:02                 | 9             |
|                                | PLIN2        | Q99541           | <b>VASTITGVM</b>       | <b>0.20422</b>        | <b>SupB15WT, SupB15RT</b>               | <b>Cw*1204</b>          | <b>433</b>    |
|                                |              |                  | <b>TSALPIIQK</b>       | <b>0.16066</b>        | <b>Fibroblast, SupB15WT, SupB15RT</b>   | <b>A*03;A*11</b>        | <b>65;17</b>  |
|                                |              |                  | VMAGDIYSV              | 0.0939                | HCT116                                  | A*02:01                 | 3             |
|                                |              |                  | <b>SVASTITGV</b>       | 0.06187               | HCT116, JY                              | A*02:01                 | 64            |
|                                |              |                  | VQKPSYYVR              | -0.22474              | HCC1143                                 | A*31:01                 | 7             |
|                                |              |                  | RAYQQALSR              | -0.29975              | Fibroblast                              | A*03:01                 | 219           |
|                                |              |                  | SLLTSSKGQLQK           | -0.64982              | Fibroblast                              | A*03:01                 | 35            |
|                                | KIF20A       | O95235           | <b>RVFQGFFTGR</b>      | <b>0.2312</b>         | <b>Fibroblast, SupB15WT, SupB15RT</b>   | <b>A*03;A*11</b>        | <b>98;80</b>  |
|                                |              |                  | VYIESRIGTST            | 0.13085               | Fibroblast                              | A*23:01                 | 9506          |
|                                |              |                  | KEAGNINTSL             | 0.10011               | HCC1937                                 | B*40:01                 | 19            |
|                                |              |                  | RSHSIFSIR              | 0.02197               | HCC1143                                 | A*31:01                 | 5             |
|                                |              |                  | TLAELQNNMV             | -0.1243               | HCT116                                  | A*02:01                 | 37            |
|                                |              |                  | STQQLQEVK              | -0.16538              | SupB15WT, SupB15RT                      | A*11                    | 50            |
|                                |              |                  | SEHLDTQKELL            | -0.17904              | HCC1937                                 | B*40:01                 | 60            |
|                                |              |                  | KLQGQVSAK              | -0.1942               | Fibroblast, SupB15WT, SupB15RT          | A*03;A*11               | 33;95         |
|                                |              |                  | VHAPPMQLGF             | -0.27886              | Fibroblast                              | B*15:18                 | 532           |
|                                |              |                  | ALRQNQQNR              | -0.31664              | HCC1143                                 | A*31:01                 | 454           |
|                                |              |                  | KLQGQVSAK              | -0.32481              | SupB15WT                                | A*03                    | 38            |
|                                | WDR46        | O15213           | <b>ASETGFLTY</b>       | <b>0.22808</b>        | <b>HCT116</b>                           | <b>A*01:01</b>          | <b>10</b>     |
|                                |              |                  | AEEEEETSIKAA           | 0.07359               | HCT116                                  | B*45:01                 | 12            |
|                                |              |                  | SQNPYNAVI              | 0.03419               | HCC1599                                 | Cw*07:01                | 376           |
|                                |              |                  | EEEEETSIKA             | 0.00164               | HCT116                                  | B*45:01                 | 16            |
|                                |              |                  | GTYQPLSTR              | -0.25594              | Fibroblast, SupB15WT, SupB15RT, HCC1143 | A*03;A*11;A*31:01       | 185;128;33    |
|                                | RhoC         | P08134           | <b>YPTDVILM</b>        | <b>0.21256</b>        | <b>HCC1143</b>                          | <b>B*35:08</b>          | <b>17</b>     |
|                                |              |                  | <b>KTKEGVREV</b>       | <b>0.20479</b>        | <b>HCC1143</b>                          | <b>Cw*06:02</b>         | <b>2326</b>   |
|                                |              |                  | ATRAGLQVR              | 0.00509               | HCC1143                                 | A*31:01                 | 41            |
|                                |              | IEVDGKQVEL       | -0.15698               | HCC1937               | B*40:01                                 | 27                      |               |
|                                |              | FSIDSPDSL        | -0.18396               | HCC1937               | Cw*03:04                                | 6                       |               |
| CPSF1                          | Q10570       | <b>FHVGAVNTF</b> | <b>0.17318</b>         | <b>Fibroblast</b>     | <b>B*15:18</b>                          | <b>57</b>               |               |
|                                |              | VADPYVVIM        | 0.1439                 | HCC1143               | B*35:08                                 | 2621                    |               |
|                                |              | RENGTMEIYQL      | 0.05078                | HCC1937               | B*40:01                                 | 9                       |               |
|                                |              | IRPQVVTTF        | 0.01434                | Fibroblast, HCC1937   | n.d                                     | n.d                     |               |
|                                |              | VVPEPGQPL        | 0.01401                | HCC1937               | Cw*03:04                                | 139                     |               |
|                                |              | VSDRDRNLMVY      | -0.00954               | HCT116                | A*01:01                                 | 9                       |               |
|                                |              | HLVSAIGQK        | -0.02877               | SupB15WT, SupB15RT    | A*03                                    | 50                      |               |
|                                |              | YEAFFPHDSQL      | -0.03522               | HCC1937               | B*40:01                                 | 85                      |               |
|                                |              | RYIHPQQEAF       | -0.04953               | Fibroblast, HCC1937   | A*23:01;A*24:02;Cw*07:02                | 43;63;80                |               |
|                                |              | TLITDGMRSV       | -0.08142               | HCT116                | A*02:01                                 | 110                     |               |
|                                |              | SVLPAYLSY        | -0.08616               | SupB15WT, SupB15RT    | A*11                                    | 34                      |               |
|                                |              | ALDEKLLNI        | -0.12563               | HCT116                | A*02:01                                 | 22                      |               |
|                                |              | GTSQLYVYR        | -0.15186               | HCC1143, SupB15WT,    | A*11                                    | 40                      |               |

|         |        |                  |                |                                |                 |            |
|---------|--------|------------------|----------------|--------------------------------|-----------------|------------|
|         |        |                  |                | SupB15RT                       |                 |            |
|         |        | RYQEESKTL        | -0.1544        | HCC1937                        | Cw*07:02        | 126        |
|         |        | RLGNSLLLK        | -0.18289       | Fibroblast, SupB15WT, SupB15RT | A*03;A*11       | 23;21      |
|         |        | SEAQSGTQL        | -0.26798       | HCC1937                        | B*40:01         | 17         |
| TP53    | P04637 | <b>VPYEPPEV</b>  | <b>0.16281</b> | <b>SupB15WT, SupB15RT</b>      | <b>B*51</b>     | <b>107</b> |
|         |        | RTEEENLRKK       | 0.13169        | Fibroblast                     | A*03:01         | 2444       |
|         |        | EYLDDRNTF        | 0.10626        | Fibroblast                     | A*23:01         | 100        |
|         |        | GLAPPQHILRV      | 0.04156        | JY                             | A*02:01         | 203        |
|         |        | TAKSVTCTY        | -0.18255       | SupB15WT, SupB15RT             | Cw*12:04        | 1530       |
|         |        | TYSPALNKMF       | -0.32825       | Fibroblast, HCC1937            | A*23:01;A*24:02 | 57;43      |
| BCL2L1  | Q07817 | <b>LHITPGTAY</b> | <b>0.15898</b> | <b>Fibroblast</b>              | <b>B*15:18</b>  | <b>24</b>  |
|         |        | IPMAAVKQAL       | -0.21723       | JY                             | B*07:02         | 12         |
| MDM2    | Q00987 | <b>SEQETLVRP</b> | <b>0.15559</b> | <b>HCT116</b>                  | <b>B*45:01</b>  | <b>509</b> |
|         |        | DEKQQHIVY        | -0.13247       | HCT116                         | B*18:01         | 4          |
|         |        | LLKSVGAQK        | -0.19903       | SupB15WT, SupB15RT             | A*03            | 94         |
| SCRN1   | Q12765 | RPRDEVQEV        | 0.13622        | HCC1937, JY                    | B*07:02         | 30         |
|         |        | TPDPSRSIF        | -0.1782        | HCC1143                        | B*35:08         | 224        |
| ENAH    | Q8N8S7 | IYHHTGNNTF       | 0.12498        | HCC1937                        | A*23:01;A*24:02 | 87;29      |
|         |        | YHHTGNNTF        | 0.09369        | Fibroblast                     | B*15:18         | 36         |
|         |        | KYNQATQTF        | -0.1191        | HCC1937                        | A*23:01;A*24:02 | 26;25      |
| DKK1    | O94907 | ALGGHPLLGV       | 0.0658         | HCT116                         | A*02:01         | 35         |
|         |        | ILYPGGNKY        | -0.07892       | Fibroblast                     | A*03:01         | 81         |
| ALDH1A1 | P00352 | AEQTPLTAL        | 0.03584        | HCC1937                        | B*40:01         | 13         |
| MMP2    | P08253 | VWSDVTPLRF       | 0.05706        | Fibroblast                     | A*23:01         | 18         |
| CES2    | O00748 | AIMESGVAL        | -0.02775       | Fibroblast                     | Cw*07:04        | 2940       |
| PAX5    | Q02548 | SPVPNGHSL        | -0.04152       | JY                             | B*07:02         | 8          |
|         |        | GVIGGSKPK        | -0.23391       | SupB15WT, SupB15RT             | A11             | 46         |
| MMP7    | P09237 | SSDPNAVMY        | -0.04119       | HCC1143                        | B*35:08         | 301        |
| MUC5AC  | P98088 | APTTSTNSA        | -0.17502       | HCT116                         | n.d             |            |
| ERBB2   | P04626 | TFESMPNPEGRY     | -0.17978       | HCT116                         | B*18:01         | 4692       |

**Table S9: HLA-I peptides identified from cancer associated proteins.**

List of 82 HLA-I peptides identified in our dataset from 25 cancer associated proteins from which other immunogenic epitopes were previously reported. Known epitopes that we detected in our dataset are marked in red, and in bold are potential immunogenic peptides with predicted immunogenicity score higher than 0.15, which are the top 20% most immunogenic peptides. The suggested HLA-I alleles are indicated with their prediction binding scores in affinity kd values were generated using NetMHC 3.4 or NetMHCcons 1.0.
