# Supplementary material
Source: PubMed Central journal article supplement (PMC4349985)

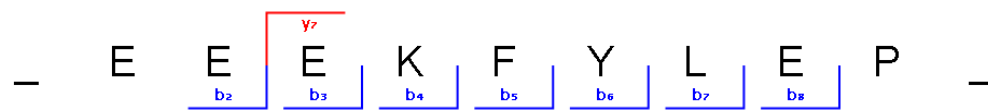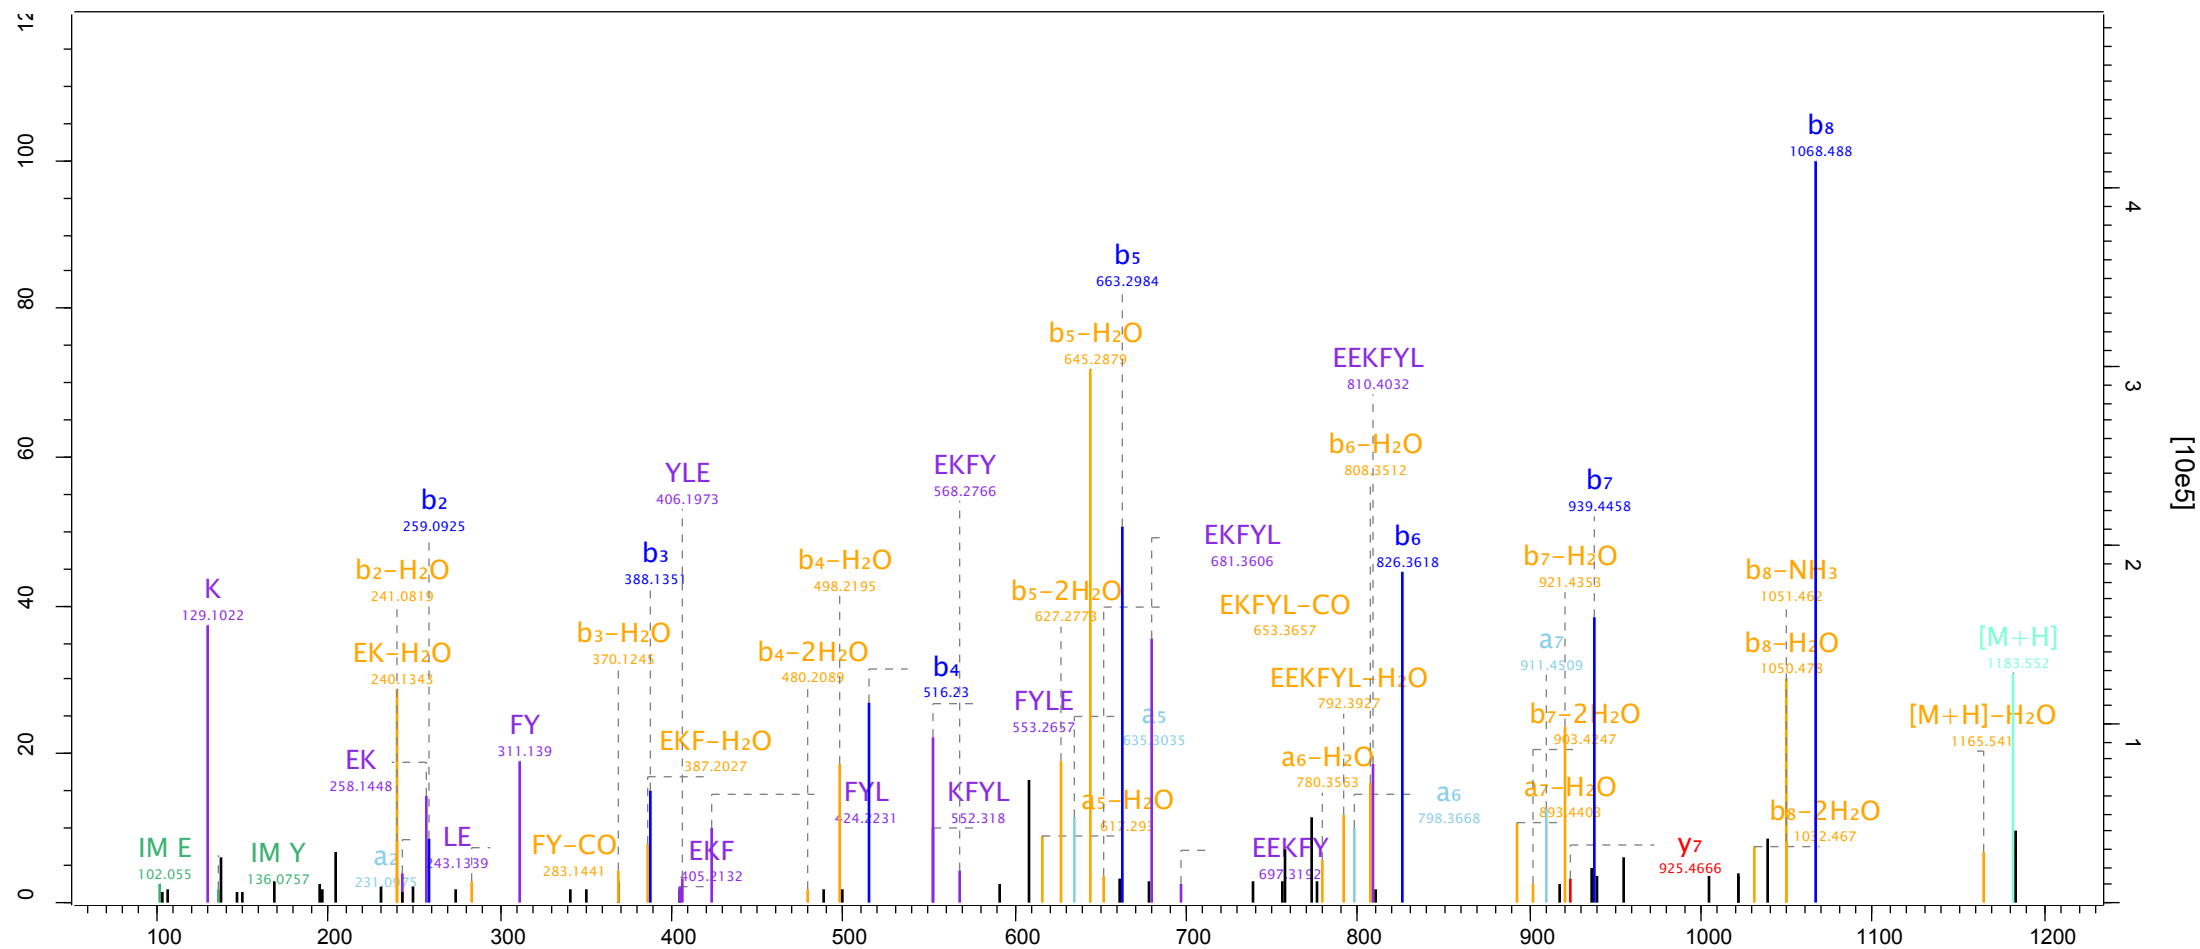

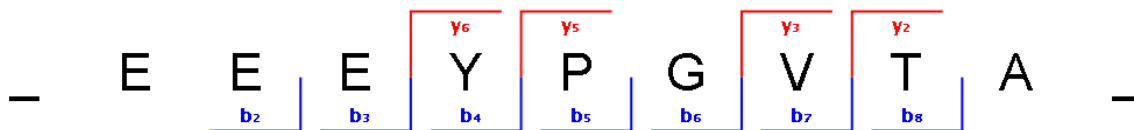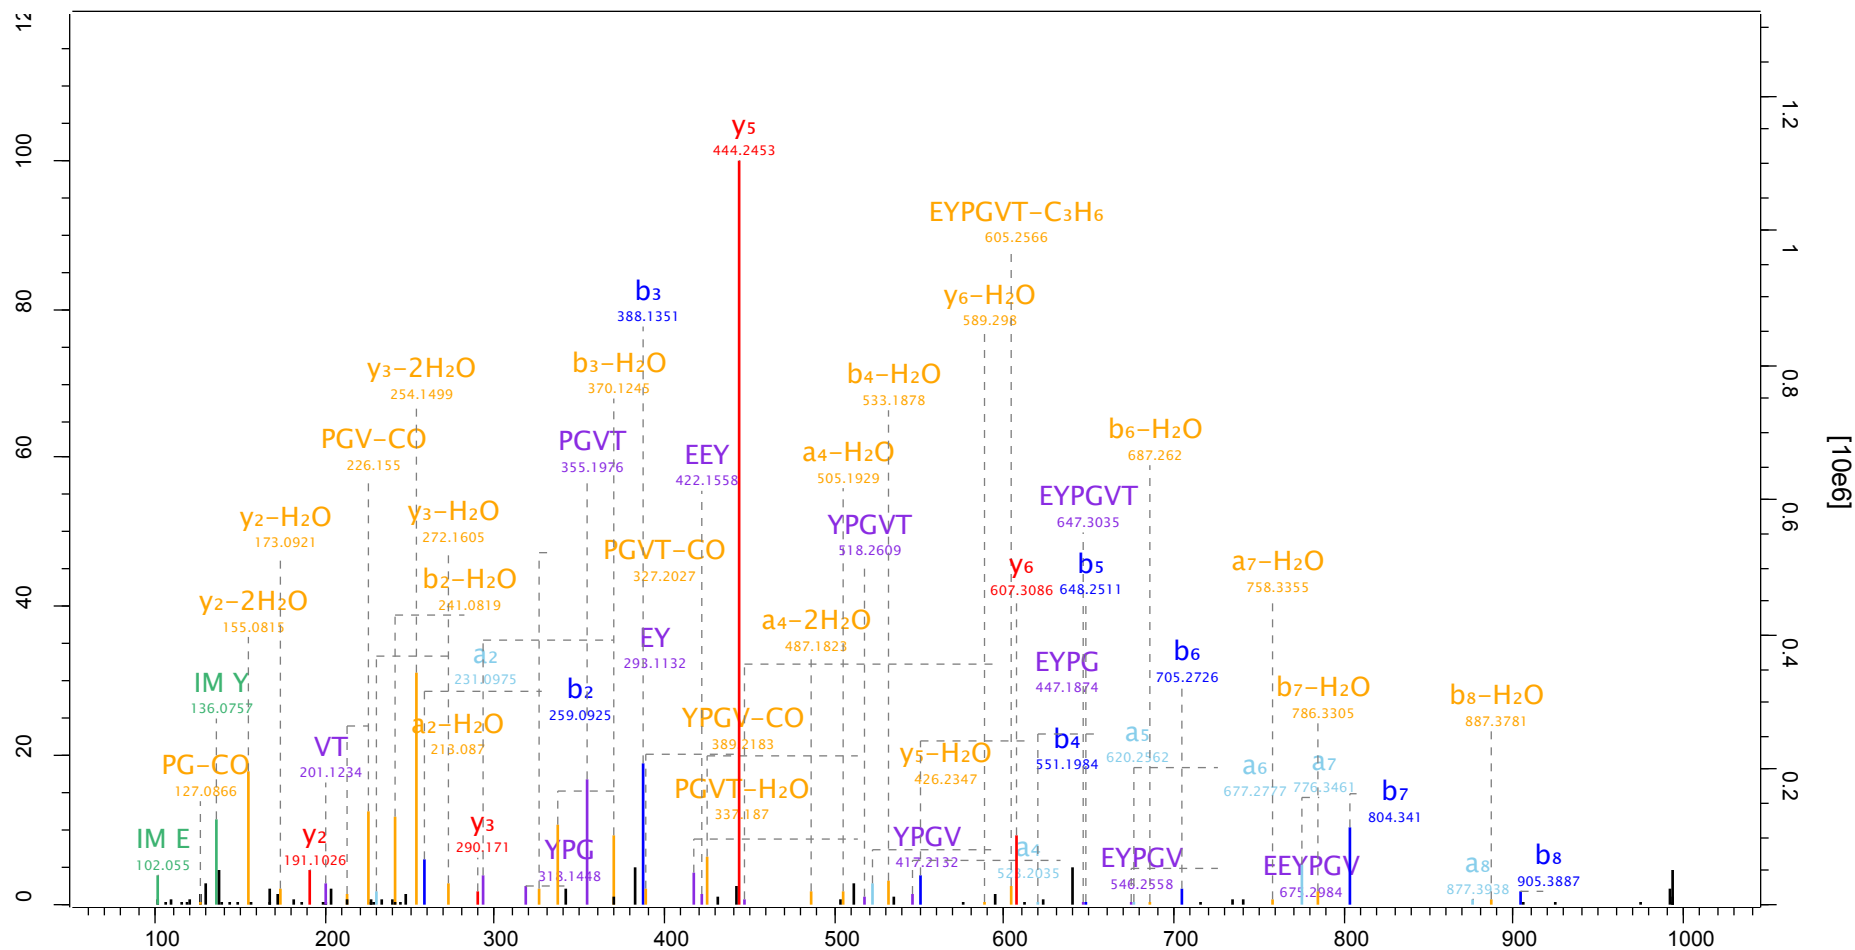

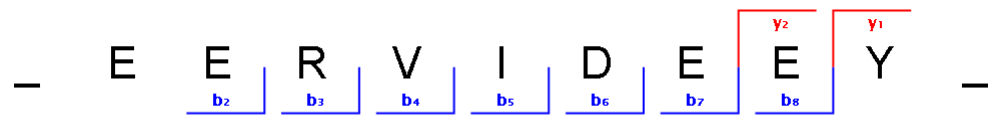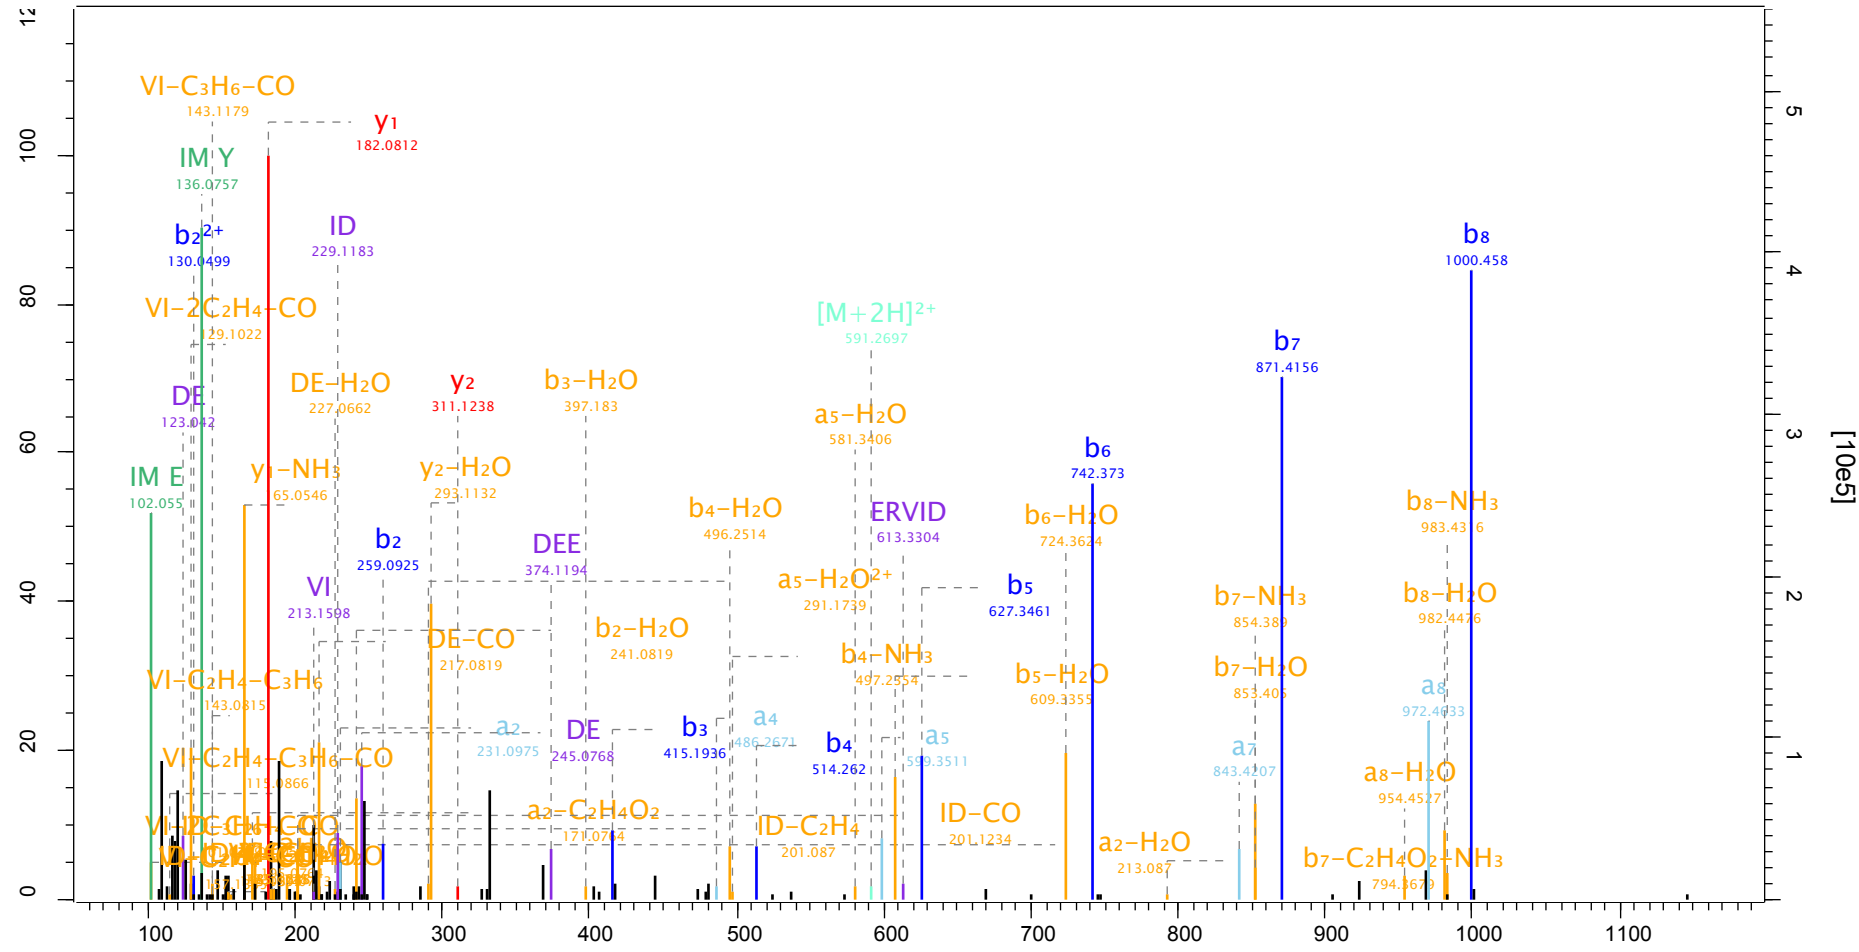

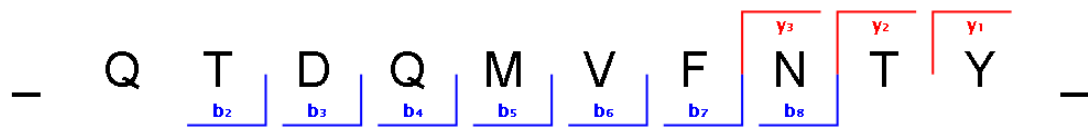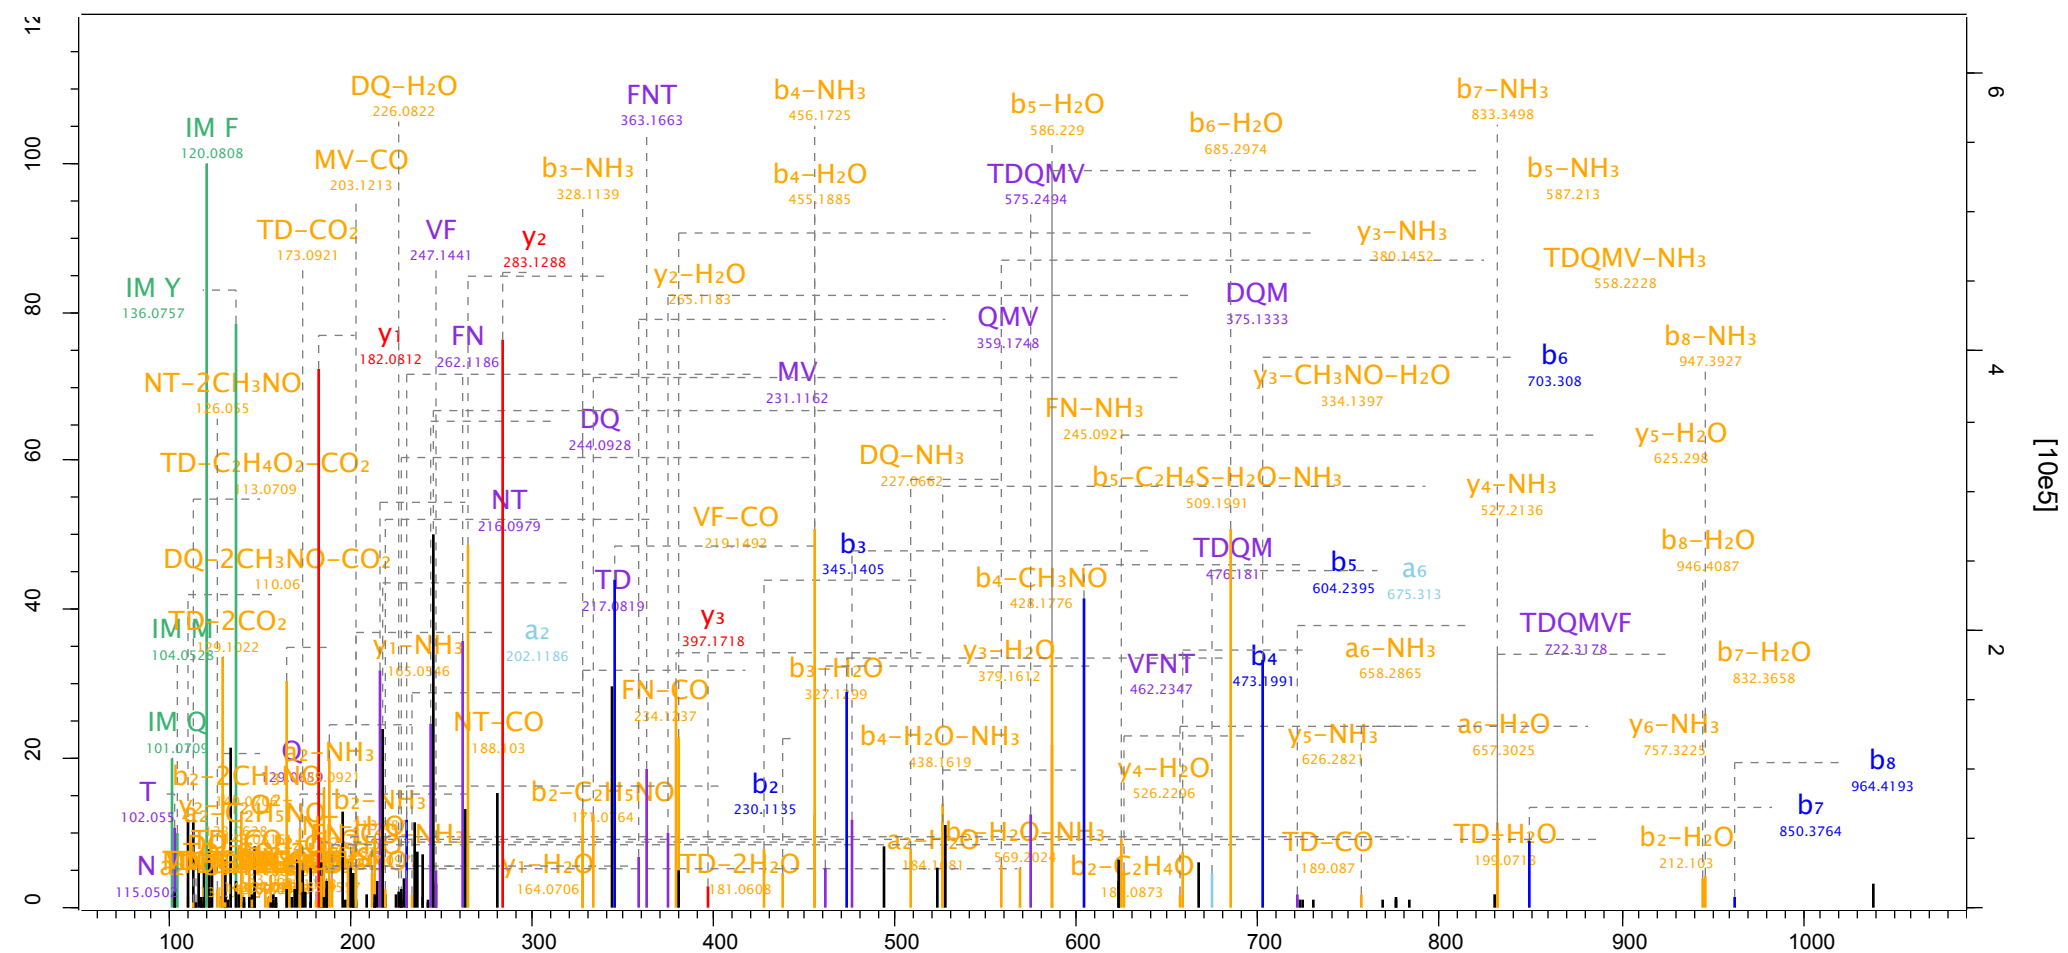

Bassani-Sternberg et al. High accuracy MS-based identification of HLA-I peptidomes

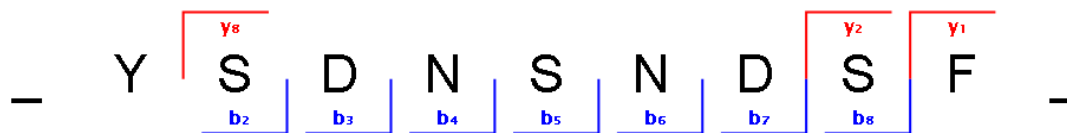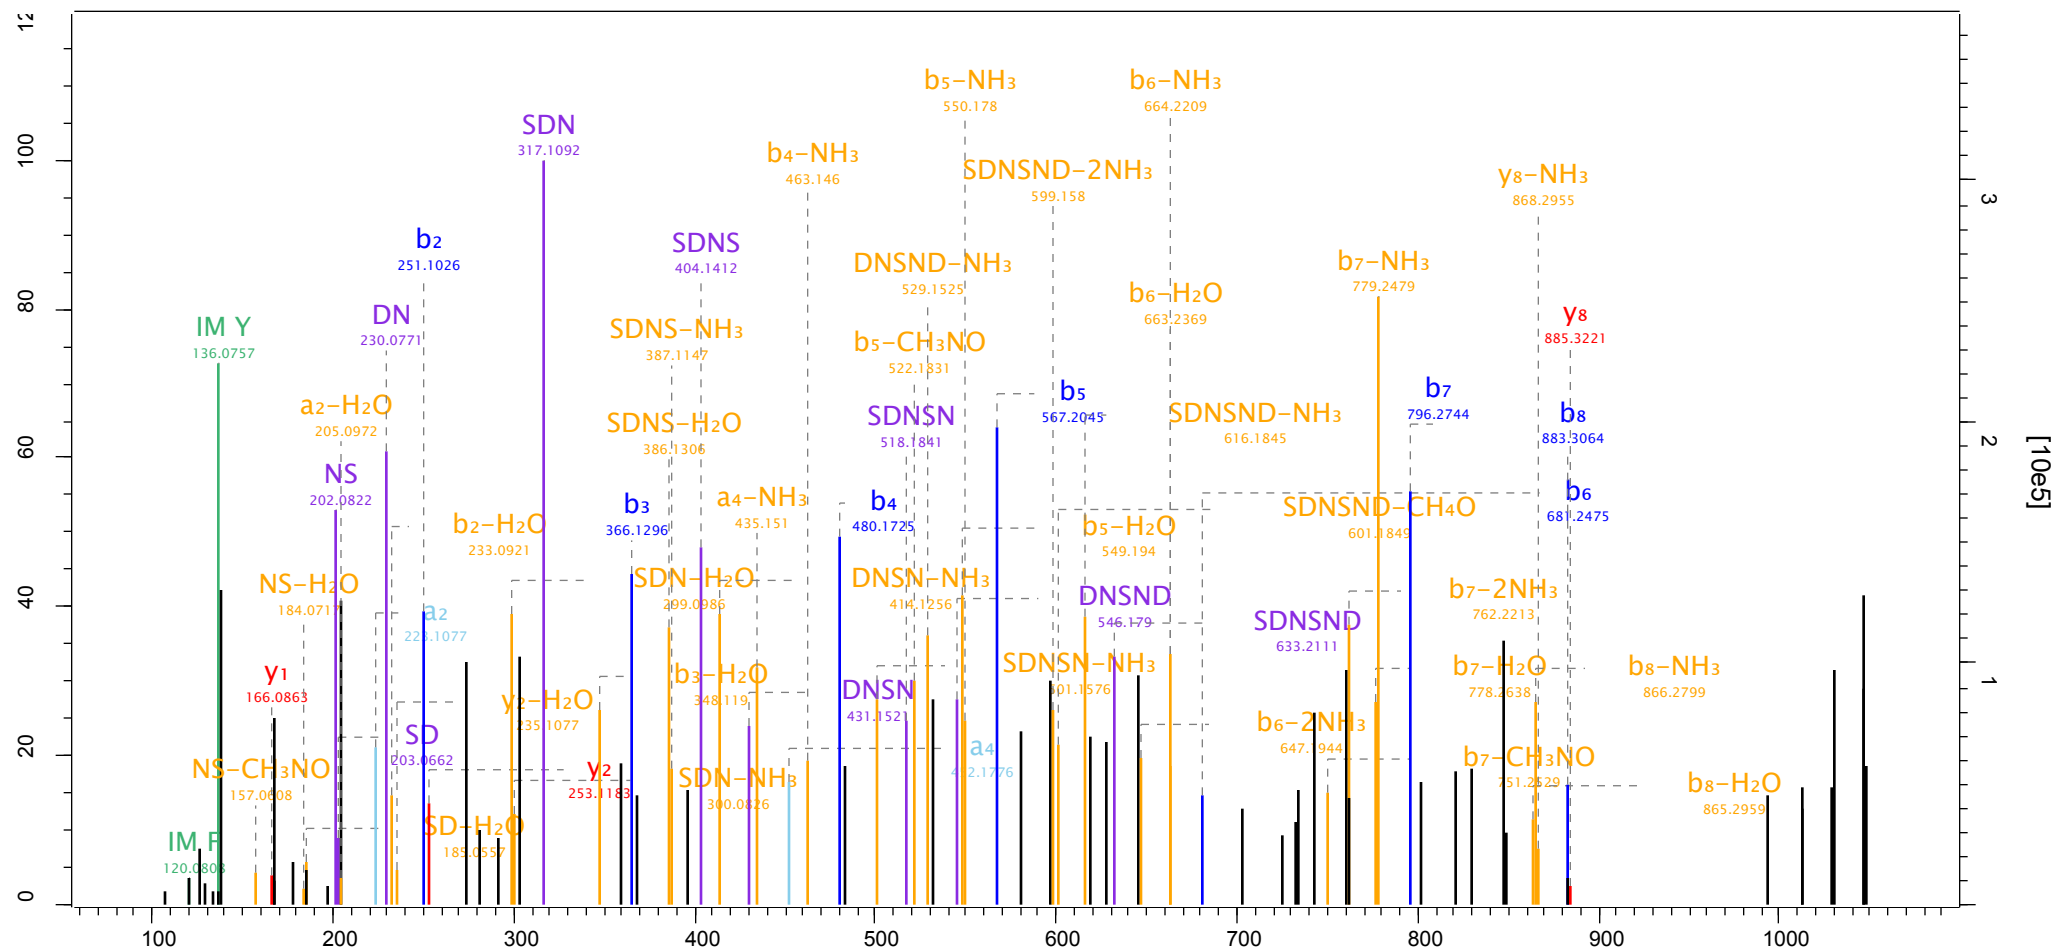

Supplement: supp_M114.042812_mcp.M114.042812-13.pdf [file supp_M114.042812_mcp.M114.042812-13.pdf]
